# Supplementary material for: A DNA packaging motor inchworms along one strand allowing it to adapt to alternative double-helical structures
Source: PubMed Central journal article supplement (PMC8187434; doi:10.1038/s41467-021-23725-5), 2021-06-08
Supplement: 41467_2021_23725_MOESM2_ESM.pdf [file 41467_2021_23725_MOESM2_ESM.pdf]

## **Description of Additional Supplementary Files**

File Name: Supplementary Movie 1

Description: The helical inchworm mechanism. For legend, refer to Figure 4.

File Name: Supplementary Movie 2

Description: Animation of the  $\phi$ 29 DNA packaging mechanism, by Grace Hsu (Animation Lab, University of Utah)
